# Supplementary material for: Influence of Strategic Cortical Infarctions on Pupillary Function
Source: Front Neurol. 2018 Oct 29;9:916. doi: 10.3389/fneur.2018.00916 (PMC6215832; doi:10.3389/fneur.2018.00916)
Supplement: Supplementary file 1 [file Table_1.XLSX]

## Sheet: Ark1
patient nr	NPiL	SizeL	MinL	%L	CVL	MCVL	DVL	LatL	NPiR	SizeR	MinR	%R	CVR	MCVR	DVR	LatR	NIHSS 24h	Infarcts, right (0 = no infarcts in either area; 1 = frontal eye field; 2 = insula; 3 = thalamus)	Infarcts, left (0 = no infarcts in either area; 1 = frontal eye field; 2 = insula; 3 = thalamus)	Non strategic lesions ( 0 = none; 1 = right side; 2 = left side; )	ASPECT (total)	ASPECT (regions) (0 = no infarcts; 1 = M1; 2 = M2; 3= M3; 4 = M4; 5 = M5; 6 = M6; 7 = caudate; 8 = putamen; 9 = internal capsule; 10 = insular cortex)	ACA/PCA infarction; 0 = none; 1 = ACA; 2 = PCA	No posterior circulation?	Any relevant previous lesions?	Age	Sex (0 = M; 1 = F )	Hypertension (0 = no; 1 = yes)	Cholesterol (0 = no; 1 = yes)	Diabetes ( 0 = no; 1 = yes)	Smoking ( 0 = no; 1 = yes)	Alkohol abuse ( 0 = no; 1 = yes)	Platelet inhibition ( 0 = no; 1 = yes)	Anticoagulation ( 0 = no; 1 = yes)	Antihypertensives ( 0 = no; 1 = yes)	Sedative drugs (0 = no; 1 = yes)	Opioids( 0 = no; 1 = yes)	Benzodiazepines ( 0 = no; 1 = yes)	AED ( 0 = no; 1 = yes )	Antidepressants ( 0 = no; 1 = yes )	Antipsychotics ( 0 = no; 1 = yes )
1	4.6	2.94	2.22	24	1.41	2.16	0.48	0.23	4.7	3.91	2.36	40	2.9	4.27	0.73	0.2	7	0	0	1	7	2,3,6	0	yes, right cerebellar hemisphere, nothing brainstem	old infarct left cerebellum and left basal ganglia	x	x	1	1	0	0	0	1	0	1	0	0	0	1	0	1
2	4.8	2.03	1.51	26	1.42	1.99	0.73	0.23	4.8	1.99	1.56	22	1.14	1.61	0.34	0.2	21 (no NIHSS available from 28/2 because of cardiac arrest an dintubation)	0	2	0	5	1,3,6,7,10	0	0	old infarction left side cerebellum	x	x	1	0	0	1	0	1	0	1	0	0	0	0	0	0
3	4.5	3.96	2.61	34	1.87	3.08	0.32	0.27	4.7	3.23	2.18	33	1.81	3.05	0.62	0.23	20	1.2	0	0	3	1,4,6,7,8,9,10	1	0	old infarction left occipital lobe	x	x	1	0	0	0	1	1	0	1	0	0	0	0	0	0
4	4.6	2.29	1.87	18	1.27	1.54	0.32	0.23	4.9	2.52	1.75	31	1.83	2.63	0.66	0.23	18	0	0	1	6	2,5,7,8	0	0	0	x	x	1	1	0	0	0	1	0	1	0	0	0	0	0	0
5	4.8	2.86	1.88	34	1.27	2.63	0.46	0.27	4.2	3.34	2.66	20	1.18	1.79	0.15	0.3	16	1.2	0	0	6	4,5,6,10	0	0	old infarction left side of cerebellum; old infarction pan? Dx - posterior part of MCA dxt	x	x	1	1	1	0	0	1	0	1	0	0	0	0	0	0
6	4.3	4.9	3.04	38	3.38	5.06	1.34	0.2	4.3	5.2	3.17	39	3.59	5.94	1.48	0.2	3	0	0	2	9	7	0	0	0	x	x	1	1	0	1	0	1	0	1	0	0	0	0	0	0
7	4.8	3.12	1.96	37	2.12	3.44	0.9	0.23	4.8	3.11	1.99	36	2.07	3.08	0.68	0.23	14	0	1	0	6	1,4,7,8	1 (left side)	0	0	x	x	1	1	0	0	0	1	0	1	0	0	0	0	0	0
8	4.1	3.02	2.56	15	1.14	1.63	0.57	0.27	3.5	3.15	2.83	10	0.88	1.21	0.24	0.27	18	0	1,2,3	0	3	1,4,5,6,7,8,10	2 (left side)	not brainstem	0	x	x	1	0	0	1	0	0	1	1	0	0	0	0	0	0
9	4.7	4.16	2.39	43	2.79	4.91	1.03	0.2	4.5	3.58	2.47	31	2.19	3.25	0.61	0.2	10	2	0	0	4	1,2,5,7,8,10	0	0	0	x	x	1	1	0	0	0	0	1	1	0	0	0	0	0	0
10	4.9	2.35	1.65	30	0.85	1.63	0.63	0.27	4.8	2.14	1.59	26	1.07	1.7	0.45	0.23	18	0	0	1	8	5.6	0	0	0	x	x	1	1	0	1	1	1	0	1	0	1	0	0	0	0
11	4.7	2.89	2.1	27	2.38	3.06	0.68	0.23	4.5	3.44	2.48	28	2.64	3.5	0.78	0.23	5	0	0	2	9	3	0	0	0	x	x	1	1	1	0	0	1	0	1	0	0	0	0	0	0
12	4.5	4.06	2.55	37	2.35	4.33	1.11	0.2	4.4	3.54	2.62	26	1.86	2.83	0.77	0.23	10	2	0	0	6	5,7,8,10	0	0	0	x	x	1	1	1	0	0	1	0	1	0	0	0	0	0	0
13	4.4	2.92	2.35	20	1.18	1.76	0.84	0.2	4.6	3.46	2.31	33	2.37	3.68	1.03	0.23	14	2	0	0	6	5,7,8,10	0	0	0	x	x	0	0	0	1	0	0	1	0	0	0	0	0	0	0
14	4.8	3.43	1.99	42	1.89	3.84	1.02	0.27	4.8	4.27	2.14	50	2.79	5.02	1.11	0.27	14	0	1	0	6	1,4,7,10	1(left side)	0	old infarction left occipital lobe	x	x	1	1	0	1	0	1	0	1	0	0	0	0	0	0
15	4.3	2.76	2.28	17	0.62	1.44	0.43	0.3	4.5	2.92	2.24	23	1.29	1.99	0.55	0.27	9	0	0	2	10	0	0	0	old infarction left temporal lobe, M3 area	x	x	1	1	1	0	0	1	0	1	0	0	0	0	0	0
16	4.3	3.11	2.49	20	1.38	1.81	0.47	0.2	4.4	3.66	2.57	30	2.28	3.16	0.82	0.23	14	0	0	1	8	7.8	0	0	old infarction right occipital lobe	x	x	1	1	0	0	0	0	1	1	0	0	0	0	0	0
17	4.2	2.86	2.38	17	1.27	1.88	0.16	0.23	4.4	2.19	1.92	12	0.91	1.18	0.19	0.27	13	0	0	1	8	2.6	0	0	old lacunar infarcts in corona radiata/ centrum semiovale bilateral	x	x	1	1	0	0	0	1	0	1	0	0	0	0	0	0
18	4	4.21	3.01	29	1.94	3.24	0.92	0.27	4.3	3.51	2.65	25	1.96	2.76	0.81	0.23	3	0	0	2	10	0	0	0	0	x	x	1	1	0	0	0	1	0	1	0	0	0	0	1	0
19	4.7	3.96	2.26	43	3.68	5.56	1.47	0.23	4.8	3.7	2.12	43	3	5.19	1.54	0.2	14	0	1.2	0	7	1,4,10	0	0	0	x	x	1	1	0	0	0	1	0	1	0	0	0	0	0	0
20	4.3	3.84	2.74	29	2.56	3.47	1.1	0.23	4.5	3.71	2.54	32	2.7	3.97	1.23	0.2	5	2	0	0	5	1,2,7,8,10	0	0	old infction left occipital lobe	x	x	1	1	1	0	0	1	0	1	0	0	0	0	0	0
21	2.9	3.68	3.24	12	0.47	0.74	0.39	0.3	3.3	4.1	3.26	20	1.72	2.03	0.4	0.3	22	2.1	0	0	2	1,2,3,4,6,7,8,10	0	0	0	x	x	1	1	0	0	0	0	1	1	0	0	0	0	0	0
22	4.7	2.21	1.75	21	1.14	1.54	0.44	0.23	4.7	2.19	1.78	19	1.28	1.61	0.42	0.23	27	0	1.2	0	5	2,4,6,8,10	1 (left side)	0	0	x	x	1	1	0	0	0	0	0	1	0	1	0	0	0	0
23	4.3	2.76	2.27	18	1.15	1.98	0.68	0.27	4.6	3.09	2.19	29	2.43	3.62	0.86	0.23	0	0	0	1	10	0	0	0	0	x	x	0	0	0	1	0	1	0	0	0	0	0	0	0	0
24	4.6	3.45	2.31	33	2.59	3.6	1.11	0.27	4.7	2.71	1.98	27	1.98	2.67	1.09	0.23	0	0	0	1	10	0	0	0	0	x	x	1	1	0	1	0	1	0	1	0	0	0	0	0	0
25	4.8	2.62	1.83	30	1.85	2.99	0.97	0.2	4.6	2.47	2	19	1.46	1.83	0.66	0.2	13	0	2	0	8	6.1	0	0	0	x	x	1	1	0	0	1	0	1	0	0	0	0	0	0	0
26	4.3	4.83	3.07	36	2.94	5.36	1.25	0.2	3.7	4.63	3.35	28	2.74	4.57	1.37	0.2	9	0	0	2	7	3,6,8	0	0	0	x	x	1	1	0	0	0	1	0	1	0	0	0	0	0	0
27	4.1	4.27	2.95	31	2.61	4.29	1.09	0.27	4.4	3.38	2.46	27	2.01	2.79	0.93	0.23	8	2	0	0	5	2,3,7,8,10	0	0	0	x	x	1	1	0	0	0	1	1	1	0	0	0	0	0	0
28	4.7	4	2.36	41	3.19	4.73	1.58	0.23	4.6	3.61	2.38	34	2.52	3.52	1.37	0.23	4	0	0	2	8	7.8	0	0	old infarction n. caudale right side	x	x	0	1	0	0	0	1	0	0	0	0	0	0	0	0
29	4	3.28	2.67	19	1.98	2.47	0.71	0.2	4.4	3.44	2.59	25	2.61	3.3	0.7	0.23	1	0	0	1	10	0	0	0	0	x	x	1	0	0	0	0	0	1	1	0	0	0	0	0	0
30	3.2	4.04	3.31	18	1.41	1.72	0.48	0.3	3.7	4.12	3.13	24	2.39	3.41	0.77	0.3	15	0	0	1	10	0	0	0	old infarction right frontal operculum (M1) and immediately superior to the M1 area in the M6	x	x	1	0	0	0	0	0	1	1	0	0	0	0	0	0
31	4.6	3.37	2.31	31	2.53	3.53	1.17	0.2	4.8	3.15	2.03	36	2.57	3.86	1.18	0.2	0	0	0	2	10	0	0	0	0	x	x	0	1	1	1	1	0	1	0	0	0	0	0	0	0
32	4.6	3.88	2.45	37	1.97	3.33	1.24	0.23	4.7	4.1	2.38	42	2.59	4.55	1.42	0.23	15	0	2	0	9	10	0	0	0	x	x	1	1	0	0	0	1	0	1	0	0	0	0	0	0
33	4.7	2.82	2.02	28	1.15	2.3	0.65	0.37	3.9	2.27	2.09	8	0.28	0.49	0.31	0.37	5	2	0	0	9	10	0	0	old infarction right occicital lobe	x	x	1	1	0	1	0	1	0	1	0	0	0	0	0	0
34	4.3	2.45	2.12	13	0.86	1.03	0.36	0.27	4.8	2.34	1.78	24	1.4	1.74	0.51	0.23	1	0	0	2	10	0	0	0	0	x	x	1	1	0	1	0	1	0	1	0	0	0	0	0	0
35	4.5	3.18	2.37	25	2.29	3.16	0.74	0.27	3.9	4.34	3.13	28	2.88	4.22	1.05	0.27	3	0	2	0	8	5.1	0	0	0	x	x	0	0	0	0	0	1	0	0	0	0	0	0	0	0
36	4.7	3.5	2.29	35	2.25	4.18	0.82	0.3	4.9	3.31	1.82	45	2.58	4.61	1.04	0.23	21	0	2	0	6	5,7,8,10	0	0	0	x	x	1	1	0	0	0	1	0	1	0	0	0	0	0	0
37	4.4	6.1	3.52	42	3.58	5.6	1.39	0.23	4.4	4.41	2.79	37	3.31	4.85	1.42	0.23	7	0	2	0	6	2,7,8,10	0	0	hypodenisities in both frontal lobes- old infarctions? More likely loss of brain parenchima after brain contusions. Past head trauma?	x	x	1	1	0	1	0	1	0	0	0	0	0	0	0	0
38	4.6	3.33	2.36	29	2.29	3.34	1.02	0.23	4.4	2.92	2.33	20	1.38	2.23	0.81	0.27	13	0	2	0	7	1,2,10	0	0	0	x	x	1	1	1	0	0	0	1	1	0	0	0	0	0	0
39	4.5	3.52	2.47	30	2.21	3.35	1.01	0.27	4.1	3.6	2.74	24	1.84	2.65	1.14	0.27	9	0	2	0	6	5,7,8,10	0	0	0	x	x	1	1	0	0	0	1	0	1	0	0	0	0	0	0
40	4.7	2.96	2	32	1.67	2.56	0.78	0.23	4.7	3.19	2.1	34	2.13	3.15	1	0.2	3	0	0	2	9	5	0	0	old infarction frontoparietal left side	x	x	1	1	0	0	0	1	0	0	0	0	0	0	0	0
41	4.6	4.19	2.6	38	2.67	3.64	1.12	0.27	4.7	3.16	2.15	32	1.88	2.93	0.89	0.27	0	0	0	2	10	0	0	0	old infarction centrum semiovale left side	x	x	1	1	1	0	0	1	0	1	0	0	0	0	0	0
42	4.9	2.57	1.6	38	1.38	2.34	0.62	0.27	4.9	2.32	1.42	39	1.61	2.74	0.92	0.23	6	0	2	0	6	2,4,5,10	0	0	0	x	x	1	1	1	1	1	1	0	1	0	0	0	0	0	0
43	4.4	3.63	2.57	29	2.97	4.03	0.94	0.23	4.6	3.95	2.43	38	3.26	5.4	1.19	0.27	0	2	0	0	8	1, 10	0	0	0	x	x	1	1	0	0	1	1	0	1	0	0	0	0	0	0
44	3.8	4.39	3.16	28	2.39	3.8	1.47	0.3	3.7	5.09	3.56	30	2.84	4.35	1.03	0.3	10	0	0	1	8	7.8	0	0	old infarction left side cerebellum	x	x	1	1	0	0	0	1	0	1	0	0	0	0	0	0
45	4.8	3.36	1.94	42	3.76	6.84	1.12	0.23	4.8	3.13	2.09	33	2.48	3.28	0.68	0.2	15	2	0	0	7	1,5,10	0	0	0	x	x	1	0	0	0	0	1	0	1	0	0	0	0	0	0
46	4.8	2.73	1.91	30	2.09	2.66	0.83	0.2	4.8	2.44	1.85	24	1.59	2.1	0.52	0.2	0	0	0	2	9	7	0	0	0	x	x	0	1	0	1	0	0	1	0	0	1	0	0	0	0
47	4.3	2.93	2.38	19	1.41	1.94		0.27	4	3.25	2.63	19	1.78	2.23	0.49	0.27	1	0	0	1	9	8	0	0	old lacunar infarction basal ganglia left side	x	x	1	1	0	0	0	1	0	1	0	1	0	0	0	0
48	4.8	2.55	1.75	31	1.44	2.37	0.7	0.27	4.8	2.01	1.54	23	0.92	1.41	0.5	0.23	24	0	0	2	10	0	0	0	0	x	x	1	1	0	1	1	1	0	0	0	0	0	0	0	0
49	3.9	3.14	2.68	15	0.89	1.21	1.46	0.23	3.7	3.2	2.78	13	1.09	2.12	1.07	0.23	4	0	0	1	8	1.8	0	0	old lacunar infarction basal ganglia left side	x	x	1	1	0	0	0	1	0	1	0	0	0	0	0	0
50	4.6	3.31	2.27	31	3.11	4.33	0.95	0.2	4.7	3.36	2.1	38	3.11	4.46	1.08	0.2	4	0	0	1	9	5	2(right )	yes, no brainstem	0	x	x	0	0	0	0	0	1	0	0	0	0	0	0	0	0
